# Supplementary material for: Coalescent Tree Imbalance and a Simple Test for Selective Sweeps Based on Microsatellite Variation
Source: PubMed Central journal article supplement (PMC3656098; doi:10.1371/journal.pcbi.1003060), 2013-05-16

**A**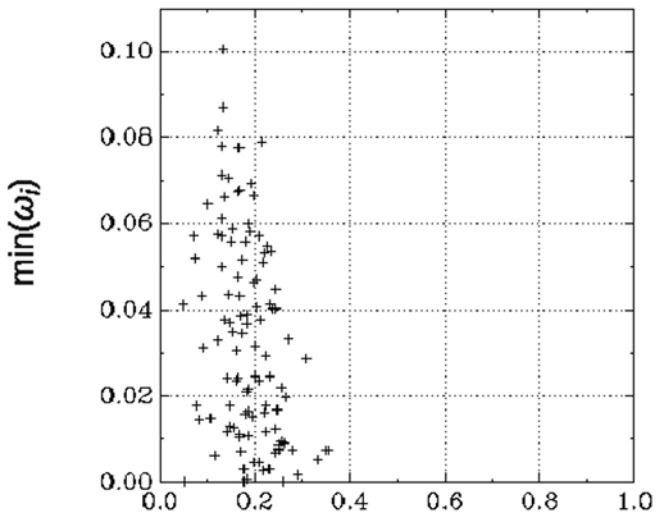**B**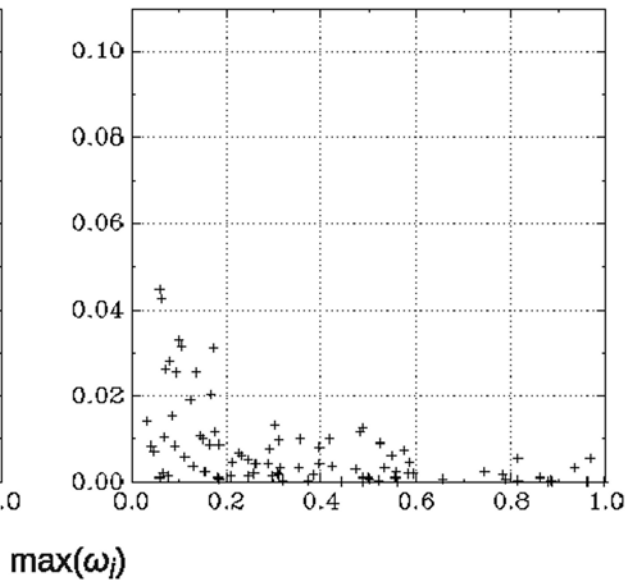

Supplement: pcbi.1003060.s004.pdf [file pcbi.1003060.s004.pdf]
