# Supplementary material for: Coalescent Tree Imbalance and a Simple Test for Selective Sweeps Based on Microsatellite Variation
Source: PubMed Central journal article supplement (PMC3656098; doi:10.1371/journal.pcbi.1003060), 2013-05-16
Supplement: pcbi.1003060.s005.pdf [file pcbi.1003060.s005.pdf]

**Table S1. Power of  $T^{(\text{sum})}$ ,  $T^{(\text{product})}$  and  $T^{(\text{dist})}$  in dependence of distance to selected site. Moderate selection strength.**

| distance (kb) | $\alpha = 0.01$      |                          |                       | $\alpha = 0.05$      |                          |                       | SKD*    |
|---------------|----------------------|--------------------------|-----------------------|----------------------|--------------------------|-----------------------|---------|
|               | $T_2^{(\text{sum})}$ | $T_2^{(\text{product})}$ | $T_0^{(\text{dist})}$ | $T_2^{(\text{sum})}$ | $T_2^{(\text{product})}$ | $T_0^{(\text{dist})}$ |         |
| -88.0         | 0.0024               | 0.00198                  | 0.01205               | 0.03773              | 0.02547                  | 0.04918               | 0.38978 |
| -78.0         | 0.00352              | 0.00249                  | 0.01219               | 0.05101              | 0.03337                  | 0.05231               | 0.46468 |
| -50.0         | 0.01279              | 0.0082                   | 0.01861               | 0.14195              | 0.08394                  | 0.08038               | 0.70152 |
| -39.0         | 0.02603              | 0.01576                  | 0.02434               | 0.22844              | 0.13637                  | 0.10191               | 0.77336 |
| -29.0         | 0.04959              | 0.03123                  | 0.03224               | 0.33846              | 0.20899                  | 0.13661               | 0.81974 |
| -19.0         | 0.09292              | 0.06603                  | 0.04913               | 0.47323              | 0.32176                  | 0.19855               | 0.82495 |
| -9.0          | 0.1528               | 0.12917                  | 0.0875                | 0.58321              | 0.44846                  | 0.31711               | 0.69911 |
| -4.0          | 0.14253              | 0.13536                  | 0.11036               | 0.55597              | 0.43924                  | 0.3397                | 0.47106 |
| -2.0          | 0.10248              | 0.10226                  | 0.09572               | 0.47656              | 0.3768                   | 0.25917               | 0.30610 |
| -1.0          | 0.06848              | 0.06854                  | 0.06862               | 0.41117              | 0.31957                  | 0.16987               | 0.20460 |
| 0.0           | 0.01823              | 0.01552                  | 0.01383               | 0.3088               | 0.22456                  | 0.01858               | 0.09020 |
| 1.0           | 0.07008              | 0.07046                  | 0.0699                | 0.41566              | 0.32085                  | 0.17263               | 0.20603 |
| 2.0           | 0.10457              | 0.1033                   | 0.09726               | 0.47807              | 0.38001                  | 0.2611                | 0.30748 |
| 3.0           | 0.12845              | 0.1248                   | 0.107                 | 0.52423              | 0.41668                  | 0.31387               | 0.39475 |
| 5.0           | 0.15041              | 0.14094                  | 0.10696               | 0.57279              | 0.45309                  | 0.34652               | 0.53361 |
| 6.0           | 0.15732              | 0.14268                  | 0.10273               | 0.58033              | 0.45513                  | 0.34908               | 0.58359 |
| 7.0           | 0.15761              | 0.14028                  | 0.0998                | 0.58929              | 0.45991                  | 0.34365               | 0.63050 |
| 8.0           | 0.15605              | 0.13543                  | 0.09382               | 0.5908               | 0.45563                  | 0.33244               | 0.67039 |
| 10.0          | 0.14787              | 0.12186                  | 0.08277               | 0.57952              | 0.43868                  | 0.30483               | 0.72507 |
| 11.0          | 0.14231              | 0.11471                  | 0.07802               | 0.56758              | 0.42758                  | 0.28931               | 0.74858 |

Selective sweep with  $s = 0.005$ ,  $\tau = 10^{-4}$ ,  $\theta = 40$ , sample size  $n = 200$ .

\* SKD-test by Schlötterer *et al.* [37]
