# Supplementary material for: Coalescent Tree Imbalance and a Simple Test for Selective Sweeps Based on Microsatellite Variation
Source: PubMed Central journal article supplement (PMC3656098; doi:10.1371/journal.pcbi.1003060), 2013-05-16
Supplement: pcbi.1003060.s006.pdf [file pcbi.1003060.s006.pdf]

**Table S2. Power of  $T^{(\text{sum})}$ ,  $T^{(\text{product})}$  and  $T^{(\text{dist})}$  in dependence of mutation rate  $\theta$ .**

| $\theta$ | $\alpha = 0.01$      |                          |                       | $\alpha = 0.05$      |                          |                       |
|----------|----------------------|--------------------------|-----------------------|----------------------|--------------------------|-----------------------|
|          | $T_2^{(\text{sum})}$ | $T_2^{(\text{product})}$ | $T_0^{(\text{dist})}$ | $T_2^{(\text{sum})}$ | $T_2^{(\text{product})}$ | $T_0^{(\text{dist})}$ |
| 0.1      | 0.00002              | 0.00217                  | 0.00083               | 0.00002              | 0.00535                  | 0.00226               |
| 0.5      | 0.00179              | 0.03451                  | 0.00831               | 0.00187              | 0.08217                  | 0.02356               |
| 1.0      | 0.01059              | 0.08174                  | 0.01697               | 0.01117              | 0.2093                   | 0.04672               |
| 1.5      | 0.02633              | 0.11888                  | 0.02419               | 0.02748              | 0.32257                  | 0.06492               |
| 2.0      | 0.04879              | 0.14453                  | 0.02802               | 0.0511               | 0.4109                   | 0.07628               |
| 2.5      | 0.0717               | 0.16441                  | 0.03246               | 0.07546              | 0.47518                  | 0.08988               |
| 3.0      | 0.09814              | 0.17805                  | 0.03528               | 0.10385              | 0.5203                   | 0.09767               |
| 4.0      | 0.14893              | 0.19934                  | 0.04269               | 0.15772              | 0.558                    | 0.11533               |
| 5.0      | 0.18859              | 0.20936                  | 0.04537               | 0.20354              | 0.55163                  | 0.12759               |
| 10.0     | 0.30562              | 0.22845                  | 0.06514               | 0.35658              | 0.43331                  | 0.18098               |
| 20.0     | 0.26084              | 0.15494                  | 0.08454               | 0.49867              | 0.44754                  | 0.22933               |
| 30.0     | 0.14708              | 0.11109                  | 0.09119               | 0.53301              | 0.43122                  | 0.24783               |
| 40.0     | 0.10262              | 0.1027                   | 0.09591               | 0.47789              | 0.37554                  | 0.26007               |
| 50.0     | 0.07607              | 0.0942                   | 0.09868               | 0.382                | 0.32858                  | 0.2699                |
| 100.0    | 0.03918              | 0.05419                  | 0.10842               | 0.24881              | 0.25069                  | 0.29666               |
| 120.0    | 0.03813              | 0.04841                  | 0.11072               | 0.20164              | 0.23363                  | 0.30353               |
| 150.0    | 0.03289              | 0.0416                   | 0.11154               | 0.16112              | 0.21642                  | 0.30764               |
| 200.0    | 0.02797              | 0.03672                  | 0.11381               | 0.14909              | 0.19115                  | 0.31096               |

Selective sweep with  $s = 0.005$ ,  $\tau = 10^{-4}$ ,  $n = 200$ ,  
distance to selected position  $x = 10kb$ .
