# Supplementary material for: Coalescent Tree Imbalance and a Simple Test for Selective Sweeps Based on Microsatellite Variation
Source: PubMed Central journal article supplement (PMC3656098; doi:10.1371/journal.pcbi.1003060), 2013-05-16
Supplement: pcbi.1003060.s007.pdf [file pcbi.1003060.s007.pdf]

**Table S3. Power of  $T^{(\text{sum})}$ ,  $T^{(\text{product})}$  and  $T^{(\text{dist})}$  in dependence of sample size  $n$ .**

| $n$  | $\alpha = 0.01$      |                          |                       | $\alpha = 0.05$      |                          |                       |
|------|----------------------|--------------------------|-----------------------|----------------------|--------------------------|-----------------------|
|      | $T_2^{(\text{sum})}$ | $T_2^{(\text{product})}$ | $T_0^{(\text{dist})}$ | $T_2^{(\text{sum})}$ | $T_2^{(\text{product})}$ | $T_0^{(\text{dist})}$ |
| 10   | N/A                  | N/A                      | 0.13996               | 0.02244              | N/A                      | 0.13996               |
| 20   | 0.00922              | 0                        | 0.14474               | 0.11729              | 0.00922                  | 0.14474               |
| 50   | 0.04367              | 0.00589                  | 0.14589               | 0.27807              | 0.12065                  | 0.14589               |
| 100  | 0.06891              | 0.04228                  | 0.13104               | 0.38301              | 0.25216                  | 0.19846               |
| 150  | 0.08789              | 0.07622                  | 0.11057               | 0.44456              | 0.33223                  | 0.22271               |
| 200  | 0.10365              | 0.10255                  | 0.0953                | 0.47803              | 0.37523                  | 0.25947               |
| 300  | 0.12471              | 0.13835                  | 0.07524               | 0.51983              | 0.43151                  | 0.26828               |
| 500  | 0.15007              | 0.18279                  | 0.09271               | 0.56083              | 0.48136                  | 0.28552               |
| 1000 | 0.17424              | 0.23261                  | 0.11754               | 0.59588              | 0.52515                  | 0.296                 |

Selective sweep with  $s = 0.005$ ,  $\tau = 10^{-4}$ ,  $\theta = 40$ ,

distance to selected position  $x = 10kb$ .

N/A: test cannot be computed due to small sample size
