# Supplementary material for: Coalescent Tree Imbalance and a Simple Test for Selective Sweeps Based on Microsatellite Variation
Source: PubMed Central journal article supplement (PMC3656098; doi:10.1371/journal.pcbi.1003060), 2013-05-16
Supplement: pcbi.1003060.s008.pdf [file pcbi.1003060.s008.pdf]

**Table S4. Power of  $T^{(\text{sum})}$ ,  $T^{(\text{product})}$  and  $T^{(\text{dist})}$  in dependence of distance to selected site. Small sample size.**

| distance (kb) | $\alpha = 0.01$      |                          |                       | $\alpha = 0.05$      |                          |                       |
|---------------|----------------------|--------------------------|-----------------------|----------------------|--------------------------|-----------------------|
|               | $T_2^{(\text{sum})}$ | $T_2^{(\text{product})}$ | $T_0^{(\text{dist})}$ | $T_2^{(\text{sum})}$ | $T_2^{(\text{product})}$ | $T_0^{(\text{dist})}$ |
| -88.0         | 0.00269              | 0.00025                  | 0.05016               | 0.0388               | 0.01095                  | 0.05016               |
| -78.0         | 0.0034               | 0.00042                  | 0.05501               | 0.04928              | 0.01456                  | 0.05501               |
| -50.0         | 0.01252              | 0.00129                  | 0.07919               | 0.13078              | 0.04168                  | 0.07919               |
| -39.0         | 0.02307              | 0.00264                  | 0.09408               | 0.19491              | 0.06638                  | 0.09408               |
| -29.0         | 0.04071              | 0.00571                  | 0.12204               | 0.2792               | 0.1048                   | 0.12204               |
| -19.0         | 0.06758              | 0.01005                  | 0.16465               | 0.377                | 0.15966                  | 0.16465               |
| -9.0          | 0.08159              | 0.01407                  | 0.22299               | 0.4181               | 0.19573                  | 0.22299               |
| -4.0          | 0.06312              | 0.00988                  | 0.20199               | 0.35016              | 0.16047                  | 0.20199               |
| -2.0          | 0.0439               | 0.00606                  | 0.14783               | 0.27544              | 0.11975                  | 0.14783               |
| -1.0          | 0.03031              | 0.00394                  | 0.09747               | 0.22061              | 0.08958                  | 0.09747               |
| 0.0           | 0.01373              | 0.0009                   | 0.02524               | 0.15324              | 0.05191                  | 0.02524               |
| 1.0           | 0.03074              | 0.00348                  | 0.09601               | 0.22469              | 0.09033                  | 0.09601               |
| 2.0           | 0.04391              | 0.00585                  | 0.14744               | 0.27455              | 0.11968                  | 0.14744               |
| 3.0           | 0.05505              | 0.00807                  | 0.18097               | 0.31678              | 0.14332                  | 0.18097               |
| 5.0           | 0.07063              | 0.01153                  | 0.21375               | 0.37395              | 0.17395                  | 0.21375               |
| 6.0           | 0.07691              | 0.0125                   | 0.22455               | 0.3912               | 0.18487                  | 0.22455               |
| 7.0           | 0.07943              | 0.0135                   | 0.22612               | 0.40368              | 0.19123                  | 0.22612               |
| 8.0           | 0.08106              | 0.014                    | 0.22627               | 0.41355              | 0.19558                  | 0.22627               |
| 10.0          | 0.08232              | 0.01407                  | 0.21908               | 0.42148              | 0.19508                  | 0.21908               |
| 11.0          | 0.08491              | 0.01438                  | 0.21251               | 0.4211               | 0.19677                  | 0.21251               |

Selective sweep with  $s = 0.005$ ,  $\tau = 10^{-4}$ ,  $\theta = 40$ , sample size  $n = 50$ .
