# Supplementary material for: Coalescent Tree Imbalance and a Simple Test for Selective Sweeps Based on Microsatellite Variation
Source: PubMed Central journal article supplement (PMC3656098; doi:10.1371/journal.pcbi.1003060), 2013-05-16
Supplement: pcbi.1003060.s009.pdf [file pcbi.1003060.s009.pdf]

**Table S5. Power of  $T^{(\text{sum})}$ ,  $T^{(\text{product})}$  and  $T^{(\text{dist})}$  in dependence of distance to selected site. Large sample size.**

| distance (kb) | $\alpha = 0.01$      |                          |                       | $\alpha = 0.05$      |                          |                       | SKD*   |
|---------------|----------------------|--------------------------|-----------------------|----------------------|--------------------------|-----------------------|--------|
|               | $T_2^{(\text{sum})}$ | $T_2^{(\text{product})}$ | $T_0^{(\text{dist})}$ | $T_2^{(\text{sum})}$ | $T_2^{(\text{product})}$ | $T_0^{(\text{dist})}$ |        |
| -88.0         | 0.00247              | 0.00353                  | 0.00764               | 0.04152              | 0.03311                  | 0.03966               | 0.3931 |
| -78.0         | 0.00348              | 0.00462                  | 0.00863               | 0.05346              | 0.04216                  | 0.0435                | 0.4833 |
| -50.0         | 0.01398              | 0.01366                  | 0.01386               | 0.15285              | 0.10515                  | 0.06729               | 0.7059 |
| -39.0         | 0.02658              | 0.0246                   | 0.0181                | 0.23877              | 0.15918                  | 0.08554               | 0.7829 |
| -29.0         | 0.05434              | 0.0491                   | 0.02617               | 0.36086              | 0.24444                  | 0.11945               | 0.8414 |
| -19.0         | 0.10551              | 0.0992                   | 0.03976               | 0.50899              | 0.3739                   | 0.17977               | 0.8532 |
| -9.0          | 0.18414              | 0.19212                  | 0.07298               | 0.63174              | 0.52356                  | 0.30889               | 0.7594 |
| -4.0          | 0.19177              | 0.22401                  | 0.10218               | 0.62366              | 0.53774                  | 0.35723               | 0.5294 |
| -2.0          | 0.14858              | 0.18127                  | 0.09373               | 0.5579               | 0.4801                   | 0.2819                | 0.3253 |
| -1.0          | 0.10237              | 0.13074                  | 0.06664               | 0.49192              | 0.41612                  | 0.18398               | 0.2103 |
| 0.0           | 0.03133              | 0.04752                  | 0.00709               | 0.38575              | 0.3077                   | 0.00912               | 0.0582 |
| 1.0           | 0.10293              | 0.13245                  | 0.06732               | 0.49034              | 0.41642                  | 0.1875                | 0.2012 |
| 2.0           | 0.14956              | 0.18541                  | 0.09428               | 0.56146              | 0.48276                  | 0.28691               | 0.3310 |
| 3.0           | 0.17586              | 0.20905                  | 0.10077               | 0.6022               | 0.51759                  | 0.33372               | 0.4418 |
| 5.0           | 0.19906              | 0.227                    | 0.09861               | 0.63721              | 0.54612                  | 0.36092               | 0.5969 |
| 6.0           | 0.19993              | 0.22093                  | 0.09322               | 0.64041              | 0.54491                  | 0.35334               | 0.6553 |
| 7.0           | 0.19492              | 0.21297                  | 0.08549               | 0.64123              | 0.5414                   | 0.33872               | 0.6930 |
| 8.0           | 0.18806              | 0.20402                  | 0.0795                | 0.6384               | 0.53484                  | 0.32225               | 0.7345 |
| 10.0          | 0.17526              | 0.18338                  | 0.06743               | 0.62424              | 0.51089                  | 0.29035               | 0.7844 |
| 11.0          | 0.1668               | 0.17187                  | 0.06374               | 0.61307              | 0.49752                  | 0.27407               | 0.8028 |

Selective sweep with  $s = 0.005$ ,  $\tau = 10^{-4}$ ,  $\theta = 40$ , sample size  $n = 500$ .

\* SKD-test by Schlötterer *et al.* [37]
