# Supplementary material for: Coalescent Tree Imbalance and a Simple Test for Selective Sweeps Based on Microsatellite Variation
Source: PubMed Central journal article supplement (PMC3656098; doi:10.1371/journal.pcbi.1003060), 2013-05-16
Supplement: pcbi.1003060.s010.pdf [file pcbi.1003060.s010.pdf]

**Table S6. Empirical false positive rate. Bottleneck model** with varying onset  $\tau$  of the bottleneck. Strength is fixed at  $0.01N$ . Significance levels  $\alpha$  are based on theoretical formulae according to eqs (7) and (8).

| $\tau$            | $\alpha = 0.01$      |                          |                       | $\alpha = 0.05$      |                          |                       | SKD*    |
|-------------------|----------------------|--------------------------|-----------------------|----------------------|--------------------------|-----------------------|---------|
|                   | $T_2^{(\text{sum})}$ | $T_2^{(\text{product})}$ | $T_0^{(\text{dist})}$ | $T_2^{(\text{sum})}$ | $T_2^{(\text{product})}$ | $T_0^{(\text{dist})}$ |         |
| $1 \cdot 10^{-4}$ | 0.02282              | 0.03524                  | 0.00655               | 0.07318              | 0.12431                  | 0.03148               | 0.10711 |
| $2 \cdot 10^{-4}$ | 0.03035              | 0.05088                  | 0.00641               | 0.09171              | 0.16072                  | 0.03078               | 0.12756 |
| $5 \cdot 10^{-4}$ | 0.04846              | 0.08163                  | 0.0062                | 0.13872              | 0.24866                  | 0.0299                | 0.17234 |
| 0.0010            | 0.06563              | 0.09262                  | 0.00655               | 0.18736              | 0.32287                  | 0.02934               | 0.21512 |
| 0.0020            | 0.07371              | 0.06852                  | 0.00651               | 0.22373              | 0.31886                  | 0.02813               | 0.25856 |
| 0.0050            | 0.0622               | 0.03664                  | 0.00758               | 0.22119              | 0.18918                  | 0.02802               | 0.25851 |
| <b>0.01</b>       | 0.02998              | 0.0161                   | 0.00896               | 0.19415              | 0.14563                  | 0.02849               | 0.24116 |
| 0.02              | 0.01045              | 0.0094                   | 0.00962               | 0.11888              | 0.08584                  | 0.02759               | 0.18383 |
| 0.05              | 0.00308              | 0.00252                  | 0.0092                | 0.04763              | 0.03502                  | 0.02734               | 0.07976 |
| 0.1               | 0.00104              | 0.00098                  | 0.00792               | 0.02201              | 0.01651                  | 0.02593               | 0.04048 |
| 0.2               | 0.0006               | 0.00052                  | 0.00713               | 0.01193              | 0.00972                  | 0.02441               | 0.02766 |
| 0.5               | 0.00041              | 0.0003                   | 0.00554               | 0.00849              | 0.00616                  | 0.02259               | 0.0334  |
| 1.0               | 0.00024              | 0.00031                  | 0.00586               | 0.00852              | 0.00631                  | 0.02481               | 0.04479 |
| 100.0             | 0.0003               | 0.00031                  | 0.00629               | 0.00901              | 0.00698                  | 0.02782               | 0.05377 |

\* SKD-test from [37].
