# Supplementary material for: Coalescent Tree Imbalance and a Simple Test for Selective Sweeps Based on Microsatellite Variation
Source: PubMed Central journal article supplement (PMC3656098; doi:10.1371/journal.pcbi.1003060), 2013-05-16
Supplement: pcbi.1003060.s011.pdf [file pcbi.1003060.s011.pdf]

**Table S7. Empirical false positive rate. Bottleneck model** with varying duration of the bottleneck. Severity (duration divided by strength) is fixed at 1. Significance levels  $\alpha$  are based on theoretical formulae according to eqs (7) and (8).

| duration      | $\alpha = 0.01$      |                          |                       | $\alpha = 0.05$      |                          |                       |
|---------------|----------------------|--------------------------|-----------------------|----------------------|--------------------------|-----------------------|
|               | $T_2^{(\text{sum})}$ | $T_2^{(\text{product})}$ | $T_0^{(\text{dist})}$ | $T_2^{(\text{sum})}$ | $T_2^{(\text{product})}$ | $T_0^{(\text{dist})}$ |
| <b>0.0010</b> | 0.04559              | 0.02314                  | 0.00934               | 0.23533              | 0.17179                  | 0.02909               |
| 0.01          | 0.02976              | 0.01627                  | 0.00934               | 0.19411              | 0.14517                  | 0.029                 |
| 0.1           | 0.00468              | 0.00325                  | 0.00667               | 0.0532               | 0.04092                  | 0.0242                |
