# Supplementary material for: Coalescent Tree Imbalance and a Simple Test for Selective Sweeps Based on Microsatellite Variation
Source: PubMed Central journal article supplement (PMC3656098; doi:10.1371/journal.pcbi.1003060), 2013-05-16
Supplement: pcbi.1003060.s012.pdf [file pcbi.1003060.s012.pdf]

**Table S8. Empirical false positive rate. Population expansion** with varying onset  $\tau$  of the expansion. Expansion rate is fixed at 10.

| $t$               | $\alpha = 0.01$      |                          |                       | $\alpha = 0.05$      |                          |                       | SKD*   |
|-------------------|----------------------|--------------------------|-----------------------|----------------------|--------------------------|-----------------------|--------|
|                   | $T_2^{(\text{sum})}$ | $T_2^{(\text{product})}$ | $T_0^{(\text{dist})}$ | $T_2^{(\text{sum})}$ | $T_2^{(\text{product})}$ | $T_0^{(\text{dist})}$ |        |
| $1 \cdot 10^{-4}$ | 0.00593              | 0.00464                  | 0.00495               | 0.04994              | 0.04341                  | 0.01912               | 0.0540 |
| $2 \cdot 10^{-4}$ | 0.00538              | 0.00439                  | 0.00462               | 0.0498               | 0.04366                  | 0.01785               | 0.0571 |
| $5 \cdot 10^{-4}$ | 0.00553              | 0.0043                   | 0.00474               | 0.04914              | 0.04511                  | 0.01705               | 0.0538 |
| 0.0010            | 0.00546              | 0.0046                   | 0.00487               | 0.05308              | 0.04848                  | 0.01625               | 0.0609 |
| 0.0020            | 0.00526              | 0.00382                  | 0.0052                | 0.05226              | 0.04673                  | 0.01545               | 0.0510 |
| 0.0050            | 0.00483              | 0.00366                  | 0.00595               | 0.05112              | 0.04475                  | 0.01429               | 0.0454 |
| 0.01              | 0.00401              | 0.003                    | 0.00624               | 0.04519              | 0.03834                  | 0.01406               | 0.0393 |
| 0.02              | 0.00202              | 0.00182                  | 0.00738               | 0.03759              | 0.02988                  | 0.0156                | 0.0265 |
| 0.05              | 0.00101              | 0.00106                  | 0.00781               | 0.02135              | 0.01816                  | 0.01853               | 0.0179 |
| 0.1               | 0.00041              | 0.00049                  | 0.00731               | 0.01294              | 0.01043                  | 0.01987               | 0.0134 |
| 0.2               | 0.00028              | 0.0003                   | 0.00639               | 0.00779              | 0.00697                  | 0.02055               | 0.0156 |
| 0.5               | 0.00021              | 0.00024                  | 0.00524               | 0.00716              | 0.00576                  | 0.02081               | 0.0152 |
| 1.0               | 0.0003               | 0.00039                  | 0.00611               | 0.00805              | 0.00593                  | 0.02392               | 0.0159 |
| 100.0             | 0.00025              | 0.00024                  | 0.00618               | 0.00884              | 0.00675                  | 0.02563               | 0.0230 |

\* SKD-test from [37]
