# Supplementary material for: Coalescent Tree Imbalance and a Simple Test for Selective Sweeps Based on Microsatellite Variation
Source: PubMed Central journal article supplement (PMC3656098; doi:10.1371/journal.pcbi.1003060), 2013-05-16
Supplement: pcbi.1003060.s014.pdf [file pcbi.1003060.s014.pdf]

**Table S10. Empirical false positive rate. Population sub-structure** with two sub-populations, split time  $t = 1$  in the past and sampling scheme  $n_1 = 190$ ,  $n_2 = 10$ . Varying migration rate  $m$  per generation per  $4N$  individuals. Significance levels  $\alpha$  are based on theoretical formulae according to eqs (7) and (8).

| $m$    | $\alpha = 0.01$      |                          |                       | $\alpha = 0.05$      |                          |                       | SKD*   |
|--------|----------------------|--------------------------|-----------------------|----------------------|--------------------------|-----------------------|--------|
|        | $T_2^{(\text{sum})}$ | $T_2^{(\text{product})}$ | $T_0^{(\text{dist})}$ | $T_2^{(\text{sum})}$ | $T_2^{(\text{product})}$ | $T_0^{(\text{dist})}$ |        |
| 0.0010 | 0.0032               | 0.0034                   | 0.02625               | 0.03051              | 0.03538                  | 0.09923               | 0.1665 |
| 0.0020 | 0.00293              | 0.0034                   | 0.02522               | 0.03025              | 0.0348                   | 0.09996               | 0.1686 |
| 0.0030 | 0.00291              | 0.00324                  | 0.02465               | 0.02934              | 0.03384                  | 0.09851               | 0.1649 |
| 0.0040 | 0.00282              | 0.00321                  | 0.02487               | 0.02976              | 0.03473                  | 0.09814               | 0.1671 |
| 0.0050 | 0.00276              | 0.00323                  | 0.02439               | 0.02966              | 0.03431                  | 0.09697               | 0.1685 |
| 0.0060 | 0.00291              | 0.00331                  | 0.02581               | 0.02988              | 0.03573                  | 0.09897               | 0.1598 |
| 0.0070 | 0.00285              | 0.00339                  | 0.02541               | 0.0306               | 0.03506                  | 0.09871               | 0.1647 |
| 0.0080 | 0.00267              | 0.00331                  | 0.02556               | 0.03024              | 0.0353                   | 0.09852               | 0.1609 |
| 0.0090 | 0.00265              | 0.00315                  | 0.02452               | 0.02947              | 0.03357                  | 0.09707               | 0.1662 |
| 0.01   | 0.00266              | 0.0031                   | 0.02483               | 0.02985              | 0.03494                  | 0.09584               | 0.1645 |
| 0.02   | 0.00308              | 0.00356                  | 0.0248                | 0.03008              | 0.03419                  | 0.09715               | 0.1570 |
| 0.03   | 0.00263              | 0.00327                  | 0.0249                | 0.02948              | 0.03351                  | 0.09634               | 0.1619 |
| 0.04   | 0.00297              | 0.00336                  | 0.02477               | 0.03024              | 0.03398                  | 0.09635               | 0.1603 |
| 0.05   | 0.00282              | 0.00329                  | 0.02508               | 0.02928              | 0.03347                  | 0.09533               | 0.1659 |
| 0.06   | 0.00291              | 0.00335                  | 0.02443               | 0.02944              | 0.03326                  | 0.09305               | 0.1559 |
| 0.07   | 0.00263              | 0.0034                   | 0.02512               | 0.02858              | 0.03268                  | 0.09284               | 0.1557 |
| 0.08   | 0.00253              | 0.00314                  | 0.02395               | 0.02865              | 0.03206                  | 0.09373               | 0.1571 |
| 0.09   | 0.00241              | 0.00311                  | 0.02437               | 0.02884              | 0.03234                  | 0.09298               | 0.1619 |
| 0.1    | 0.00256              | 0.00333                  | 0.02518               | 0.02765              | 0.03192                  | 0.09343               | 0.1671 |
| 0.2    | 0.00251              | 0.00327                  | 0.02388               | 0.02637              | 0.03052                  | 0.08726               | 0.1516 |
| 0.3    | 0.00218              | 0.0025                   | 0.02241               | 0.02502              | 0.02785                  | 0.08285               | 0.1519 |
| 0.4    | 0.00186              | 0.00253                  | 0.02061               | 0.02297              | 0.02545                  | 0.07677               | 0.1384 |
| 0.5    | 0.00164              | 0.00211                  | 0.02109               | 0.02234              | 0.02486                  | 0.07454               | 0.1448 |
| 0.6    | 0.00161              | 0.00233                  | 0.02053               | 0.02145              | 0.02336                  | 0.07061               | 0.1337 |
| 0.7    | 0.00154              | 0.002                    | 0.01927               | 0.02039              | 0.02229                  | 0.06779               | 0.1316 |
| 0.8    | 0.00154              | 0.00207                  | 0.01929               | 0.01982              | 0.0218                   | 0.06605               | 0.1284 |
| 0.9    | 0.00147              | 0.00172                  | 0.0173                | 0.01954              | 0.02067                  | 0.06398               | 0.1273 |
| 1.0    | 0.0013               | 0.00191                  | 0.01834               | 0.01772              | 0.01933                  | 0.0627                | 0.1261 |
| 1.5    | 0.00108              | 0.00135                  | 0.01531               | 0.01656              | 0.01616                  | 0.05283               | 0.1163 |
| 2.0    | 0.00085              | 0.00113                  | 0.01406               | 0.01427              | 0.01465                  | 0.04847               | 0.1049 |
| 4.0    | 0.00059              | 0.00072                  | 0.0113                | 0.01083              | 0.01027                  | 0.03996               | 0.0903 |
| 6.0    | 0.00053              | 0.00058                  | 0.00958               | 0.00943              | 0.00911                  | 0.0346                | 0.0808 |
| 8.0    | 0.00037              | 0.00041                  | 0.00864               | 0.00853              | 0.00783                  | 0.03292               | 0.0731 |
| 10.0   | 0.00036              | 0.00049                  | 0.00839               | 0.00837              | 0.00753                  | 0.0327                | 0.0702 |

\* SKD-test from [37]
