# Supplementary material for: Coalescent Tree Imbalance and a Simple Test for Selective Sweeps Based on Microsatellite Variation
Source: PubMed Central journal article supplement (PMC3656098; doi:10.1371/journal.pcbi.1003060), 2013-05-16
Supplement: pcbi.1003060.s015.pdf [file pcbi.1003060.s015.pdf]

**Table S11. Empirical false positive rate. Population sub-structure** with two sub-populations, split time  $t = 1$  in the past and sampling scheme  $n_1 = 180$ ,  $n_2 = 20$ . Varying migration rate  $m$  per generation per  $4N$  individuals. Significance levels  $\alpha$  are based on theoretical formulae according to eqs (7) and (8).

| $m$    | $\alpha = 0.01$      |                          |                       | $\alpha = 0.05$      |                          |                       | SKD*   |
|--------|----------------------|--------------------------|-----------------------|----------------------|--------------------------|-----------------------|--------|
|        | $T_2^{(\text{sum})}$ | $T_2^{(\text{product})}$ | $T_0^{(\text{dist})}$ | $T_2^{(\text{sum})}$ | $T_2^{(\text{product})}$ | $T_0^{(\text{dist})}$ |        |
| 0.0010 | 0.00197              | 0.0014                   | 0.01377               | 0.02399              | 0.01993                  | 0.05616               | 0.1894 |
| 0.0020 | 0.00198              | 0.00152                  | 0.01423               | 0.02445              | 0.02137                  | 0.05811               | 0.1893 |
| 0.0030 | 0.0015               | 0.00143                  | 0.01323               | 0.02343              | 0.01992                  | 0.05627               | 0.1841 |
| 0.0040 | 0.00191              | 0.00162                  | 0.01447               | 0.02497              | 0.02086                  | 0.05828               | 0.1803 |
| 0.0050 | 0.00176              | 0.00156                  | 0.01443               | 0.02441              | 0.02026                  | 0.05765               | 0.1866 |
| 0.0060 | 0.00177              | 0.00142                  | 0.0141                | 0.02396              | 0.02012                  | 0.05781               | 0.1886 |
| 0.0070 | 0.0019               | 0.00166                  | 0.01463               | 0.02406              | 0.02048                  | 0.05678               | 0.1863 |
| 0.0080 | 0.00164              | 0.00126                  | 0.01411               | 0.02339              | 0.01971                  | 0.05825               | 0.1847 |
| 0.0090 | 0.00183              | 0.0015                   | 0.01455               | 0.02446              | 0.0207                   | 0.05646               | 0.1835 |
| 0.01   | 0.00157              | 0.0015                   | 0.01428               | 0.0235               | 0.02051                  | 0.05809               | 0.1857 |
| 0.02   | 0.0015               | 0.00143                  | 0.01422               | 0.02477              | 0.01939                  | 0.05741               | 0.1746 |
| 0.03   | 0.00174              | 0.0014                   | 0.01425               | 0.02284              | 0.01987                  | 0.05649               | 0.1833 |
| 0.04   | 0.00175              | 0.00139                  | 0.01452               | 0.02404              | 0.02058                  | 0.05852               | 0.1791 |
| 0.05   | 0.00168              | 0.00143                  | 0.01365               | 0.0231               | 0.01938                  | 0.05487               | 0.1765 |
| 0.06   | 0.00182              | 0.0015                   | 0.01403               | 0.02267              | 0.01933                  | 0.05672               | 0.1837 |
| 0.07   | 0.00183              | 0.00146                  | 0.01434               | 0.02358              | 0.02012                  | 0.05625               | 0.1786 |
| 0.08   | 0.00161              | 0.00155                  | 0.01359               | 0.02304              | 0.01943                  | 0.05567               | 0.1748 |
| 0.09   | 0.00177              | 0.00137                  | 0.01342               | 0.02359              | 0.01949                  | 0.05539               | 0.1787 |
| 0.1    | 0.00162              | 0.00125                  | 0.01383               | 0.02223              | 0.01878                  | 0.05529               | 0.1821 |
| 0.2    | 0.00146              | 0.00131                  | 0.01368               | 0.02134              | 0.01845                  | 0.05454               | 0.1701 |
| 0.3    | 0.00144              | 0.00119                  | 0.01298               | 0.02022              | 0.01743                  | 0.05323               | 0.1611 |
| 0.4    | 0.00132              | 0.00125                  | 0.01351               | 0.01995              | 0.01781                  | 0.05164               | 0.1595 |
| 0.5    | 0.00136              | 0.00137                  | 0.0129                | 0.01873              | 0.0165                   | 0.05076               | 0.1534 |
| 0.6    | 0.00123              | 0.00112                  | 0.01309               | 0.01836              | 0.01675                  | 0.05062               | 0.1522 |
| 0.7    | 0.00117              | 0.00119                  | 0.01252               | 0.0174               | 0.01535                  | 0.04955               | 0.1365 |
| 0.8    | 0.00104              | 0.00106                  | 0.01208               | 0.01715              | 0.01513                  | 0.04755               | 0.1409 |
| 0.9    | 0.00112              | 0.00124                  | 0.01232               | 0.01678              | 0.01547                  | 0.04723               | 0.1400 |
| 1.0    | 0.00085              | 0.00087                  | 0.0121                | 0.01571              | 0.01395                  | 0.04523               | 0.1322 |
| 1.5    | 0.00074              | 0.00087                  | 0.01134               | 0.01334              | 0.01257                  | 0.04351               | 0.1184 |
| 2.0    | 0.00087              | 0.00083                  | 0.01077               | 0.01259              | 0.01147                  | 0.03993               | 0.1040 |
| 4.0    | 0.00039              | 0.00065                  | 0.00913               | 0.01035              | 0.00903                  | 0.03572               | 0.0880 |
| 6.0    | 0.00035              | 0.00054                  | 0.0086                | 0.0084               | 0.00766                  | 0.03228               | 0.0818 |
| 8.0    | 0.00028              | 0.00045                  | 0.0082                | 0.00804              | 0.00755                  | 0.03158               | 0.0755 |
| 10.0   | 0.00042              | 0.00037                  | 0.00809               | 0.00761              | 0.00674                  | 0.0304                | 0.0705 |

\* SKD-test from [37]
