# Supplementary material for: Coalescent Tree Imbalance and a Simple Test for Selective Sweeps Based on Microsatellite Variation
Source: PubMed Central journal article supplement (PMC3656098; doi:10.1371/journal.pcbi.1003060), 2013-05-16
Supplement: pcbi.1003060.s016.pdf [file pcbi.1003060.s016.pdf]

**Table S12. Empirical false positive rate. Population sub-structure** with two sub-populations, split time  $t = 1$  in the past and sampling scheme  $n_1 = 150$ ,  $n_2 = 50$ . Varying migration rate  $m$  per generation per  $4N$  individuals. Significance levels  $\alpha$  are based on theoretical formulae according to eqs (7) and (8).

| $m$    | $\alpha = 0.01$      |                          |                       | $\alpha = 0.05$      |                          |                       | SKD*   |
|--------|----------------------|--------------------------|-----------------------|----------------------|--------------------------|-----------------------|--------|
|        | $T_2^{(\text{sum})}$ | $T_2^{(\text{product})}$ | $T_0^{(\text{dist})}$ | $T_2^{(\text{sum})}$ | $T_2^{(\text{product})}$ | $T_0^{(\text{dist})}$ |        |
| 0.0010 | 0.00037              | 0.00034                  | 0.00646               | 0.00971              | 0.00696                  | 0.02802               | 0.0960 |
| 0.0020 | 0.00034              | 0.00034                  | 0.00648               | 0.00955              | 0.00696                  | 0.02831               | 0.1007 |
| 0.0030 | 0.00038              | 0.00033                  | 0.00684               | 0.00922              | 0.00691                  | 0.02932               | 0.1014 |
| 0.0040 | 0.0004               | 0.00042                  | 0.00689               | 0.01001              | 0.00745                  | 0.02877               | 0.1060 |
| 0.0050 | 0.00036              | 0.00031                  | 0.00644               | 0.00942              | 0.00667                  | 0.02811               | 0.1008 |
| 0.0060 | 0.00038              | 0.00028                  | 0.00613               | 0.00972              | 0.00699                  | 0.02753               | 0.0940 |
| 0.0070 | 0.00028              | 0.00033                  | 0.0063                | 0.00964              | 0.00686                  | 0.02915               | 0.0975 |
| 0.0080 | 0.00043              | 0.00042                  | 0.00687               | 0.00957              | 0.00736                  | 0.02924               | 0.1052 |
| 0.0090 | 0.00031              | 0.00029                  | 0.00669               | 0.00995              | 0.00747                  | 0.02911               | 0.1029 |
| 0.01   | 0.00036              | 0.00033                  | 0.00677               | 0.00919              | 0.00707                  | 0.02839               | 0.0996 |
| 0.02   | 0.00035              | 0.00038                  | 0.00664               | 0.00935              | 0.00699                  | 0.02837               | 0.1029 |
| 0.03   | 0.00031              | 0.00036                  | 0.00654               | 0.0095               | 0.00701                  | 0.02894               | 0.1021 |
| 0.04   | 0.00037              | 0.00037                  | 0.00644               | 0.01004              | 0.00743                  | 0.02807               | 0.1063 |
| 0.05   | 0.00031              | 0.00032                  | 0.007                 | 0.00953              | 0.00694                  | 0.02816               | 0.0976 |
| 0.06   | 0.00041              | 0.00038                  | 0.00701               | 0.00982              | 0.00719                  | 0.02869               | 0.1018 |
| 0.07   | 0.00025              | 0.00021                  | 0.00629               | 0.00989              | 0.007                    | 0.02872               | 0.0990 |
| 0.08   | 0.00043              | 0.00044                  | 0.00688               | 0.00977              | 0.00733                  | 0.02924               | 0.1043 |
| 0.09   | 0.00034              | 0.00033                  | 0.00694               | 0.00973              | 0.00744                  | 0.02865               | 0.0990 |
| 0.1    | 0.00033              | 0.00031                  | 0.0067                | 0.00934              | 0.00715                  | 0.02896               | 0.0972 |
| 0.2    | 0.00027              | 0.00033                  | 0.00721               | 0.00951              | 0.00681                  | 0.02946               | 0.0972 |
| 0.3    | 0.00021              | 0.00031                  | 0.00663               | 0.0086               | 0.00643                  | 0.0286                | 0.0913 |
| 0.4    | 0.00033              | 0.00038                  | 0.00668               | 0.00896              | 0.00699                  | 0.02856               | 0.0917 |
| 0.5    | 0.00033              | 0.00042                  | 0.00686               | 0.00953              | 0.00689                  | 0.02883               | 0.0911 |
| 0.6    | 0.00032              | 0.00035                  | 0.0071                | 0.00885              | 0.00654                  | 0.02862               | 0.0874 |
| 0.7    | 0.00032              | 0.00036                  | 0.00672               | 0.00828              | 0.00659                  | 0.02913               | 0.0838 |
| 0.8    | 0.00045              | 0.0004                   | 0.00646               | 0.00846              | 0.00689                  | 0.0277                | 0.0872 |
| 0.9    | 0.00038              | 0.00045                  | 0.00668               | 0.00871              | 0.00716                  | 0.02889               | 0.0832 |
| 1.0    | 0.00034              | 0.00041                  | 0.00639               | 0.00881              | 0.00694                  | 0.02835               | 0.0774 |
| 1.5    | 0.00038              | 0.00021                  | 0.00668               | 0.00797              | 0.00635                  | 0.02848               | 0.0818 |
| 2.0    | 0.00029              | 0.00034                  | 0.0066                | 0.00812              | 0.00644                  | 0.02843               | 0.0692 |
| 4.0    | 0.00029              | 0.00031                  | 0.00641               | 0.00738              | 0.00611                  | 0.02779               | 0.0650 |
| 6.0    | 0.00033              | 0.00027                  | 0.00629               | 0.00745              | 0.00647                  | 0.02716               | 0.0583 |
| 8.0    | 0.00026              | 0.00022                  | 0.0068                | 0.00671              | 0.00575                  | 0.02824               | 0.0536 |
| 10.0   | 0.00022              | 0.0003                   | 0.00633               | 0.00666              | 0.00537                  | 0.02645               | 0.0514 |

\* SKD-test from [37]
