# Supplementary material for: Coalescent Tree Imbalance and a Simple Test for Selective Sweeps Based on Microsatellite Variation
Source: PubMed Central journal article supplement (PMC3656098; doi:10.1371/journal.pcbi.1003060), 2013-05-16
Supplement: pcbi.1003060.s017.pdf [file pcbi.1003060.s017.pdf]

**Table S13. Empirical false positive rate. Mutation model with jumps of size 2.**

Varying probability  $p$  for a step of size 2. With probability  $1 - p$  the step size is 1. Significance levels  $\alpha$  are based on theoretical formulae according to eqs (7) and (8).

| $p$    | $\alpha = 0.01$      |                          |                       | $\alpha = 0.05$      |                          |                       | SKD*    |
|--------|----------------------|--------------------------|-----------------------|----------------------|--------------------------|-----------------------|---------|
|        | $T_2^{(\text{sum})}$ | $T_2^{(\text{product})}$ | $T_0^{(\text{dist})}$ | $T_2^{(\text{sum})}$ | $T_2^{(\text{product})}$ | $T_0^{(\text{dist})}$ |         |
| 0.0010 | 0.00031              | 0.0004                   | 0.00608               | 0.00938              | 0.00683                  | 0.02684               | 0.05516 |
| 0.0020 | 0.00049              | 0.0004                   | 0.00613               | 0.00935              | 0.00673                  | 0.02634               | 0.05400 |
| 0.0050 | 0.00045              | 0.0003                   | 0.00668               | 0.00905              | 0.00715                  | 0.02849               | 0.05555 |
| 0.01   | 0.00048              | 0.00042                  | 0.00571               | 0.00913              | 0.0068                   | 0.02661               | 0.05613 |
| 0.02   | 0.00032              | 0.00032                  | 0.00615               | 0.00898              | 0.00686                  | 0.02739               | 0.05829 |
| 0.05   | 0.00034              | 0.0004                   | 0.00626               | 0.00939              | 0.00692                  | 0.02727               | 0.06330 |
| 0.1    | 0.0004               | 0.00037                  | 0.00578               | 0.00911              | 0.00689                  | 0.02799               | 0.06949 |
| 0.2    | 0.00034              | 0.0004                   | 0.00636               | 0.00962              | 0.00718                  | 0.02906               | 0.08212 |
| 0.5    | 0.00039              | 0.00049                  | 0.00706               | 0.00881              | 0.00752                  | 0.03051               | 0.10526 |
| 1.0    | 0.00042              | 0.00033                  | 0.00573               | 0.00919              | 0.00667                  | 0.02786               | 0.05468 |

\* SKD-test from [37]
