# Supplementary material for: Coalescent Tree Imbalance and a Simple Test for Selective Sweeps Based on Microsatellite Variation
Source: PubMed Central journal article supplement (PMC3656098; doi:10.1371/journal.pcbi.1003060), 2013-05-16
Supplement: pcbi.1003060.s018.pdf [file pcbi.1003060.s018.pdf]

**Table S14. Empirical false positive rate. Mutation model with jumps of size 7.**  
Varying probability  $p$  for a step of size 7. With probability  $1 - p$  the step size is 1. Significance levels  $\alpha$  are based on theoretical formulae according to eqs (7) and (8).

| $p$    | $\alpha = 0.01$      |                          |                       | $\alpha = 0.05$      |                          |                       | SKD*    |
|--------|----------------------|--------------------------|-----------------------|----------------------|--------------------------|-----------------------|---------|
|        | $T_2^{(\text{sum})}$ | $T_2^{(\text{product})}$ | $T_0^{(\text{dist})}$ | $T_2^{(\text{sum})}$ | $T_2^{(\text{product})}$ | $T_0^{(\text{dist})}$ |         |
| 0.0010 | 0.0006               | 0.00056                  | 0.00904               | 0.01013              | 0.00917                  | 0.03397               | 0.05994 |
| 0.0020 | 0.00064              | 0.00079                  | 0.0124                | 0.01245              | 0.01149                  | 0.04063               | 0.06283 |
| 0.0050 | 0.00117              | 0.00156                  | 0.01743               | 0.01532              | 0.01705                  | 0.05315               | 0.07643 |
| 0.01   | 0.00141              | 0.00213                  | 0.02254               | 0.02011              | 0.0233                   | 0.06715               | 0.09604 |
| 0.02   | 0.00226              | 0.00327                  | 0.02432               | 0.02711              | 0.03064                  | 0.07248               | 0.13298 |
| 0.05   | 0.00252              | 0.00315                  | 0.01724               | 0.02917              | 0.03067                  | 0.06025               | 0.20621 |
| 0.1    | 0.00191              | 0.00199                  | 0.01178               | 0.02452              | 0.02395                  | 0.04676               | 0.26965 |
| 0.2    | 0.00129              | 0.00107                  | 0.00825               | 0.01841              | 0.01529                  | 0.03595               | 0.30976 |
| 0.5    | 0.00062              | 0.00047                  | 0.00661               | 0.01194              | 0.00915                  | 0.03049               | 0.34659 |
| 1.0    | 0.00045              | 0.00029                  | 0.00658               | 0.00886              | 0.00715                  | 0.02886               | 0.05459 |

\* SKD-test from [37]
